# Supplementary material for: DNA Methyltransferase 3b in Myeloid Cells Does Not Affect the Acute Immune Response in the Airways during Pseudomonas Pneumonia
Source: MDPI journal article supplement (doi:10.3390/cells11050787), 2022-02-24

# Supplementary Document

**Supplementary Figure S1.** Dnmt3b and Dnmt3a mRNA levels in neutrophils of *Dnmt3b<sup>fl/fl</sup>Mrp8<sup>Cre</sup>* mice and their littermate control mice (*Dnmt3b<sup>fl/fl</sup>*). Data is shown as bar graphs with mean + SEM, n = 6. \*p < 0.05

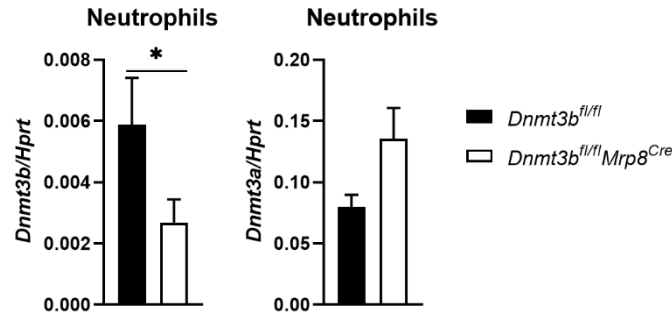

**Supplementary Figure S2.** Dnmt3b (A) and Dnmt3a mRNA levels (B) in alveolar macrophages (AMs), peritoneal macrophages (PM) and bone marrow-derived macrophages (BMDMs) of *Dnmt3b<sup>fl/fl</sup>LysM<sup>Cre</sup>* mice and their littermate control mice (*Dnmt3b<sup>fl/fl</sup>*). Data is shown as bar graphs with mean + SEM, n = 6. \*p < 0.05

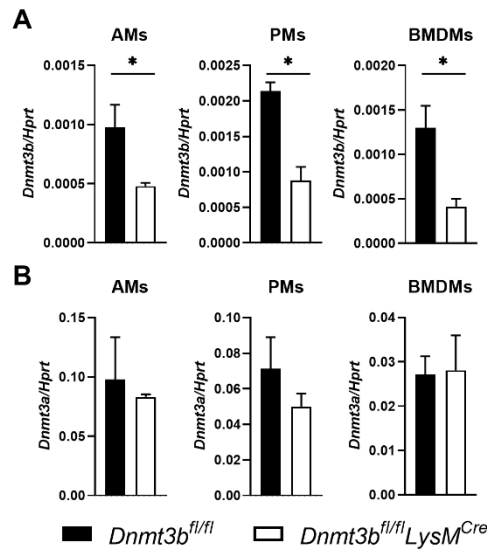

**Supplementary Figure S3. Myeloid cell Dnmt3b deficiency does not affect the host response during acute pneumonia caused by flagellin deficient *Pseudomonas aeruginosa*.** Myeloid cell specific Dnmt3b deficient mice (*Dnmt3b<sup>fl/fl</sup>LysM<sup>Cre</sup>*) and littermate controls (*Dnmt3b<sup>fl/fl</sup>*) were infected with viable flagellin deficient PAK ( $5 \times 10^6$  CFU) via the airways. 6 h after infection, (A) bacterial counts (colony forming units, CFU), (B) neutrophil numbers, (C) neutrophil CD11b expression, (D) myeloperoxidase (MPO), (E) elastase, (F) IL- $\beta$ , IL-6 and TNF levels in bronchoalveolar lavage fluid (BALF) were determined. Data is shown as bar graphs with mean + SEM, n = 8.

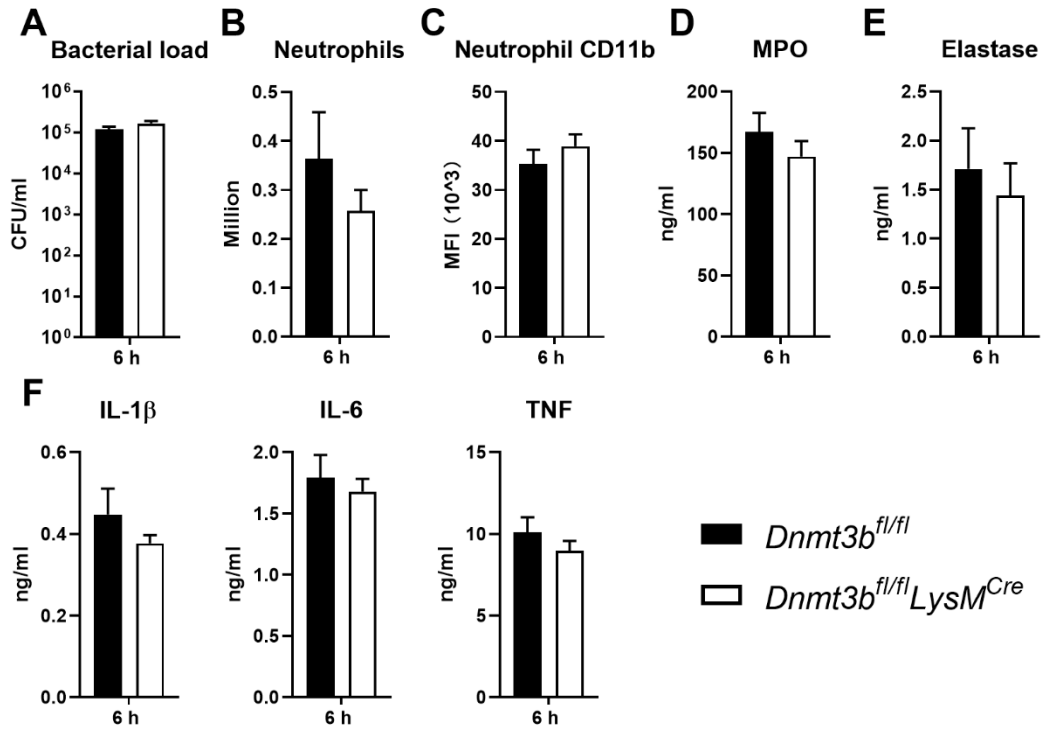

Supplement: s1 [file s1]
